# Supplementary material for: Real-space observation of ergodicity transitions in artificial spin ice
Source: PubMed Central journal article supplement (PMC10499874; doi:10.1038/s41467-023-41235-4), 2023-09-14
Supplement: 41467_2023_41235_MOESM1_ESM.pdf [file 41467_2023_41235_MOESM1_ESM.pdf]

## Supplementary Information

### Real-space observation of ergodicity transitions in artificial spin ice

Michael Saccone<sup>1\*</sup>, Francesco Caravelli<sup>1</sup>, Kevin Hofhuis<sup>2,3</sup>, Scott Dhuey<sup>4</sup>, Andreas Scholl<sup>5</sup>, Cristiano Nisoli<sup>1</sup>, and Alan Farhan<sup>6\*</sup>

<sup>1</sup>Center for Nonlinear Studies and Theoretical Division, Los Alamos National Laboratory, Los Alamos, New Mexico 87545, USA.

<sup>2</sup>Laboratory for Mesoscopic Systems, Department of Materials, ETH Zurich, 8093 Zurich, Switzerland.

<sup>3</sup>Laboratory for Multiscale Materials Experiments (LMX), Paul Scherrer Institute, 5232 Villigen PSI, Switzerland.

<sup>4</sup>Molecular Foundry, Lawrence Berkeley National Laboratory, One Cyclotron Road, CA 94720, USA.

<sup>5</sup>Advanced Light Source, Lawrence Berkeley National Laboratory, One Cyclotron Road, CA 94720, USA.

<sup>6</sup>Department of Physics, Baylor University, Waco, Texas, 76798, USA.

### Supplementary Figures

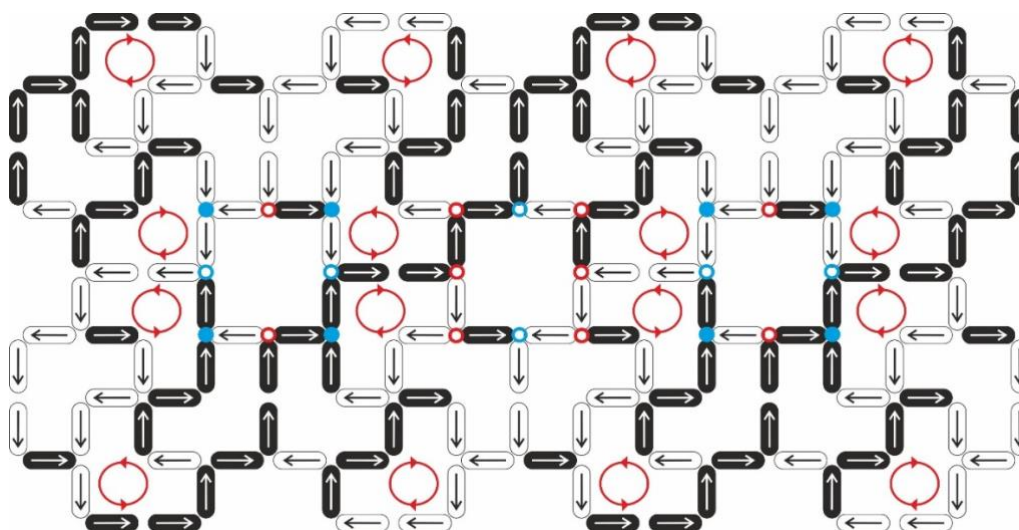

**Supplementary Figure 1. Nearest-neighbor ground state.** An arrangement of moments that settles each coordination two and four vertex into its local ground state while minimizing the proportion of Type B vertices, visualized by filled blue or red circles, to 25% of coordination three sites. Each coordination four vertex may independently switch orientation along with its adjacent coordination two vertices without changing local dipolar energy, resulting in an extensive bitwise entropy of  $s = 1/20$  due to the size of the unit cell containing the coordination four vertex being 20.

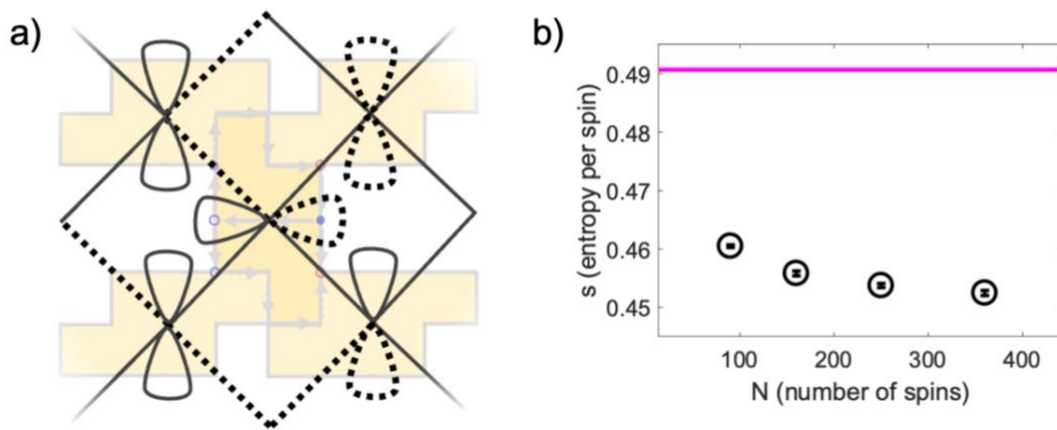

**Supplementary Figure 2. Theoretical prediction for the entropy per spin based on the degeneracy of Type B placement.** **a**, A graph comprising a square grid with two loops per node that represents the potential placement of Type B vertices. In the empirically supported model, precisely two edges per node must be selected as Type B vertices. The dotted lines represent one such configuration, corresponding to the spin structure of the greyed out underlying lattice. **b**, Two estimates of the entropy per spin. The pink line is the Pauling upper bound on entropy per bit,  $s = \frac{1}{10} \log_2 2 \binom{6}{2}$ , derived by considering an isolated node. The black circles are brute force estimates of the entropy of graphs corresponding to increasing numbers of spins. The placement of a neighboring Type B vertex may constrain another node's configurations, reducing the total entropy.
